# Supplementary material for: Novel MAG Variant Causes Cerebellar Ataxia with Oculomotor Apraxia: Molecular Basis and Expanded Clinical Phenotype
Source: MDPI journal article supplement (doi:10.3390/jcm9041212), 2020-04-23
Supplement: s1 [file s1]

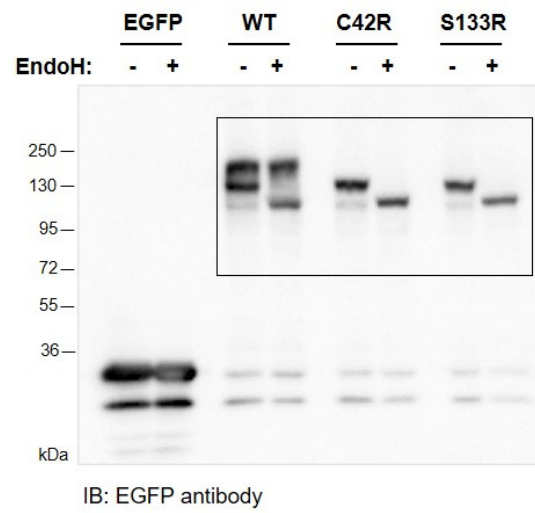

**Figure S1.** Original blot referring to main Figure 2B. Black box indicate the region selected for presentation in Figure 2B.

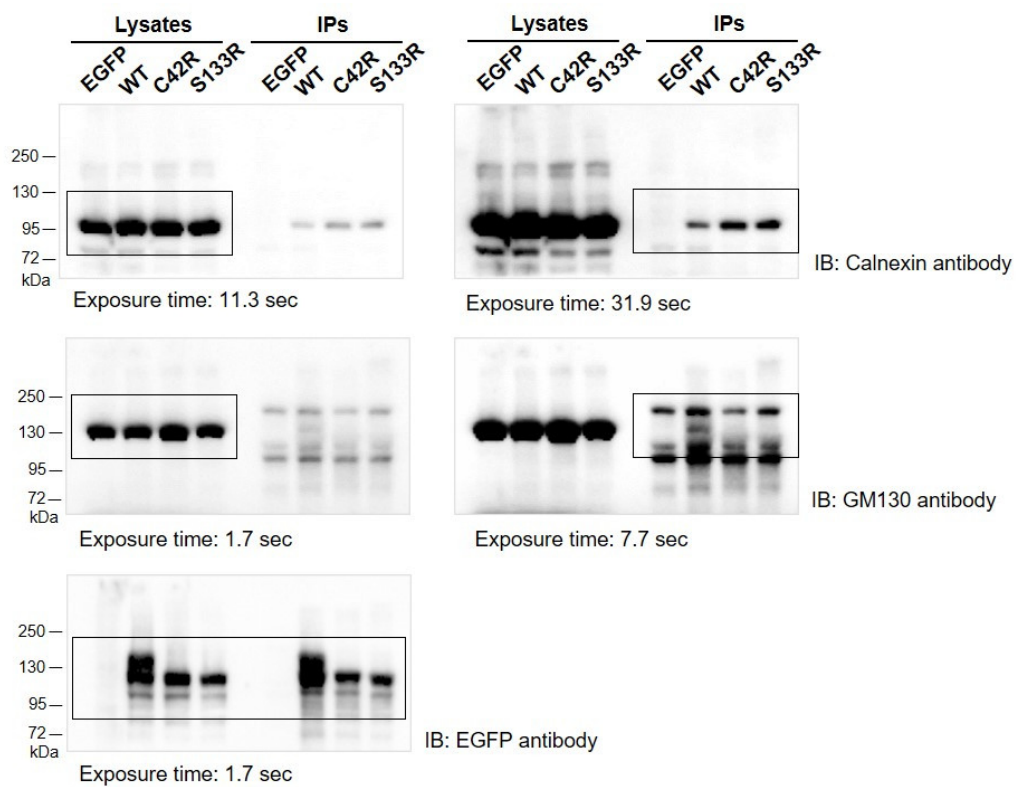

**Figure S2.** Original blots referring to main Figure 3B. Black boxes indicate the regions selected for presentation in Figure 3B.

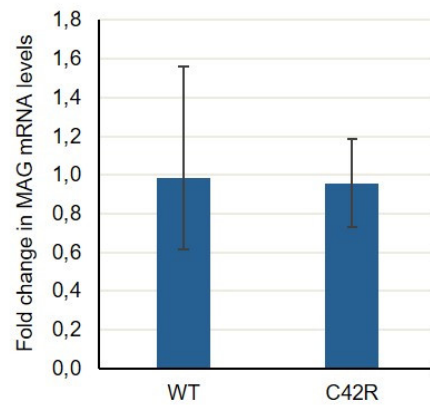

**Figure S3.** Quantitative analysis of *MAG* mRNA levels at 48h after transfection by real time-PCR. *MAG* levels were normalized towards *ACTB* levels. Data are presented the mean  $\pm$  SD of three independent experiments.

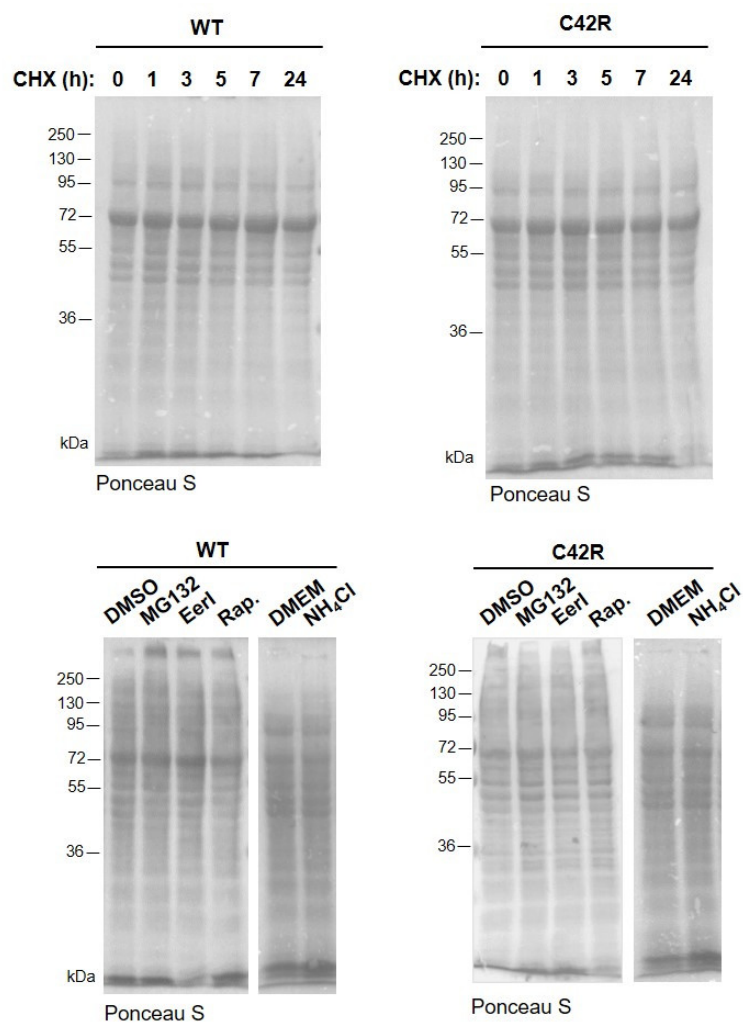

**Figure S4.** Original blots stained with Ponceau S referring to main Figure 4A and 4B.

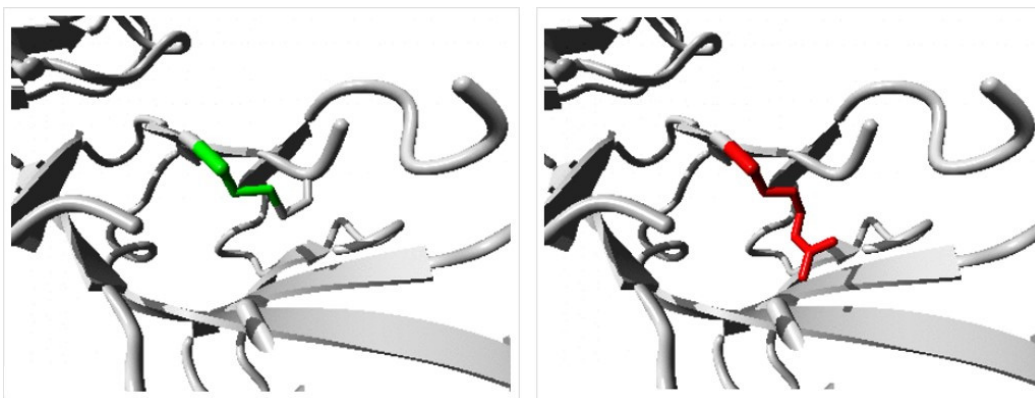

**Figure S5.** Visualization of the amino acids Cys42 (left figure, in green) and Arg52 (right figure, in red) on the protein structure of MAG, as seen on the HOPE report.

**Table S1.** Genome studio results showing loss of heterozygosity regions common to patients II.1 and II.3. The region where the *MAG* variant (c.124T>C) is located is highlighted.

| Chromosome | Start     | End       | Size     | Confidence score |
|------------|-----------|-----------|----------|------------------|
| 3          | 75453100  | 107714075 | 32260975 | 8.983.827        |
| 4          | 52706270  | 60746052  | 8039782  | 7.159.385        |
| 6          | 57169715  | 58752089  | 1582374  | 3.857.165        |
| 6          | 61891638  | 63893492  | 2001854  | 9.347.172        |
| 7          | 118569946 | 119577292 | 1007346  | 259.741          |
| 9          | 4380096   | 9970747   | 5590651  | 1054.75          |
| 10         | 73917890  | 75407649  | 1489759  | 5.009.144        |
| 10         | 79729726  | 83594473  | 3864747  | 4.939.252        |
| 10         | 95543430  | 102996362 | 7452932  | 6.561.357        |
| 12         | 37927114  | 39229699  | 1302585  | 4.032.793        |
| 13         | 71081605  | 72411637  | 1330032  | 141.106          |
| 15         | 72097461  | 73320015  | 1222554  | 5.093.042        |
| 15         | 76397903  | 77825149  | 1427246  | 6.387.458        |
| 19         | 34142750  | 51480511  | 17337761 | 737.532          |
| 21         | 29803501  | 31111412  | 1307911  | 1.098.249        |

**Table S2.** List of homozygous variants located in loss of heterozygosity (LOH) regions. Intronic, UTR, intergenic and synonymous variants, and variants found in homozygosity in gnomAD were excluded.

| Chr | Genomic position | RefSNPs     | Gene           | cDNA      | Protein      | Acession number | MAF        | CADD_phred | SIFT score | Mutation Taster score | Polyphen2 score |
|-----|------------------|-------------|----------------|-----------|--------------|-----------------|------------|------------|------------|-----------------------|-----------------|
| 19  | 35786593         | -           | <i>MAG</i>     | c.124T>C  | p.Cys42Arg   | NM_002361.4     | -          | 28         | 0          | 1                     | 1               |
| 19  | 35617187         | rs148987769 | <i>LGI4</i>    | c.1286T>C | p.Ile429Thr  | NM_139284.3     | 0.2075%    | 31         | 0.06       | 0.986                 | 0.992           |
| 19  | 39915627         | rs200639701 | <i>PLEKHG2</i> | c.3854A>G | p.Tyr1285Cys | NM_022835.3     | 0.003901%  | 26         | 0.13       | 1                     | 0.99            |
| 10  | 96084656         | rs771149406 | <i>PLCE1</i>   | c.6728G>A | p.Arg2243Gln | NM_016341.4     | 0.0008840% | 28         | 0          | 0.999                 | 1               |

The genomic position is relative to human assembly GRCh37 (hg19). Chr, chromosome; MAF, minor allele frequency (gnomAD, Non-Finish European).
